# Supplementary material for: Body fat percentage is a key factor in elevated plasma levels of caffeine and its metabolite in women
Source: PeerJ. 2025 Jun 9;13:e19480. doi: 10.7717/peerj.19480 (PMC12161129; doi:10.7717/peerj.19480)
Supplement: Supplemental Information 2 [file peerj-13-19480-s002.xlsx]

## Sheet: Arkusz1
Oral contraceptives	Caf users	Group	CAF dosadge [mg]	CAF concentration [µg/ml]	PX concentration [µg/ml]	TB concentration [µg/ml]	Age [years]	gender	BMI [kg/m2]	Relative fat mass [%]	Absolute fat mass [kg]	Fat-free mass [kg]	Skeletal muscle mass [kg]	Extracellular water [l]	Intracellular water [l]	Hydratation	waist circumference [cm]	Weight [kg]	Height [cm]
yes	High	nonobese	275.4	2.91	2.65	0.7	23	Female	18.386	16.275	7.47	38.43	17.62	11.2	16.9	66.272	62	45.9	158
yes	Low	nonobese	339.9	2.54	1.05	0.6	23	Female	20.072	22.701	12.86	43.79	20.86	13.2	19.3	68.394	64	56.65	168
yes	Low	nonobese	331.5	3.82	1.92	0.61	22	Female	19.118	22.172	12.25	43	20.2	12.9	18.8	68.617	62	55.25	170
no	Low	nonobese	384.9	1.34	0.81	1.02	25	Female	22.197	22.666	14.54	49.61	23.9	14.9	21.6	68.981	70	64.15	170
no	High	nonobese	324.3	6.15	0.39	0.31	23	Female	21.928	26.494	14.32	39.73	17.72	11.9	16.8	70.833	65	54.05	157
no	Low	nonobese	263.7	1.58	0.3	0.07	23	Female	18.06	23.709	10.42	33.53	14.59	10	14.1	70.922	60	43.95	156
no	Moderate	nonobese	306.3	3.872	1.91	0.35	22	Female	19.941	23.918	12.21	38.84	17.42	12	16.7	71.856	62	51.05	160
no	Low	nonobese	331.2	3.04	0.89	0.33	23	Female	20.032	15.507	8.56	46.64	20.91	14.3	19.8	72.222	65	55.2	166
no	Moderate	nonobese	357.6	2.09	1.18	0.66	27	Female	20.868	19.228	11.46	48.14	21.4	15.1	20.2	74.752	71	59.6	169
no	High	nonobese	354.6	0.71	0.45	0.1	22	Female	22.244	21.54	12.73	46.37	20.94	14.6	19.5	74.872	70	59.1	163
no	High	nonobese	334.8	1.4	0.29	0.13	26	Female	20.747	24.265	13.54	42.26	18.3	13.3	17.3	76.879	67	55.8	164
no	High	nonobese	374.4	0.46	0.39	0	25	Female	20.849	25.593	15.97	46.43	21.03	15	19.3	77.72	66	62.4	173
no	Low	nonobese	322.8	5.39	1.4	0.18	27	Female	21.016	23.494	12.64	41.16	17.42	13.3	16.6	80.12	73	53.8	160
no	High	nonobese	309.6	0.73	0.53	0.13	23	Female	18.282	25.097	12.95	38.65	16	12.4	15.2	81.579	59	51.6	168
no	High	obese	389.4	18.03	3.74	1.02	22	Female	23.271	31.849	20.67	44.23	19.76	14.8	21.8	67.89	71	64.9	167
no	Moderate	obese	339.3	11.49	3.24	0.66	22	Female	21.025	30.433	17.21	39.34	16.57	14.4	21.1	68.246	66	56.55	164
no	Moderate	obese	420	10.04	1.3	0.31	29	Female	27.344	30.071	21.05	48.95	24.41	17.2	24	71.667	74	70	160
no	High	obese	387.3	9.19	1.07	0.52	28	Female	21.568	30.488	19.68	44.87	20.92	14.3	19.9	71.859	68	64.55	173
yes	Low	obese	402.6	4.58	1.141	0	25	Female	21.662	30.805	20.67	46.43	19.64	16	22	72.727	78	67.1	176
yes	High	obese	306.9	6.86	1.61	0.21	23	Female	21.568	30.89	15.8	35.35	14.6	12.3	16.8	73.214	65	51.15	154
yes	Low	obese	403.2	12.46	2.52	2.51	29	Female	23.253	30.61	20.57	46.63	21.63	14.5	19.8	73.232	75	67.2	170
yes	Low	obese	471.6	9.11	3.59	0.22	31	Female	27.197	33.893	26.64	51.96	25.3	16.5	22.4	73.661	81	78.6	170
yes	Moderate	obese	537.6	15.77	1.18	0.13	30	Female	28.279	39.509	35.4	54.2	26.84	17.3	23	75.217	93	89.6	178
yes	Moderate	obese	457.2	19.5	3	0.72	28	Female	25.168	32.808	25	51.2	24.17	16.4	21.6	75.926	76	76.2	174
yes	Low	obese	533.1	12.23	5.13	0.65	28	Female	30.744	44.142	39.22	49.63	24	16	21	76.19	83	88.85	170
yes	Low	obese	339.9	6.63	0.65	0.33	25	Female	22.129	32.462	18.39	38.26	17.15	12.3	16.1	76.398	69	56.65	160
yes	High	obese	468	13.16	1.8	0.17	24	Female	26.366	30.769	24	54	22.45	16.9	21.98	76.888	86	78	172
yes	Moderate	obese	574.2	14.29	6.64	1.05	22	Female	29.537	44.117	42.22	53.48	25.92	17.4	22.4	77.679	87	95.7	180
yes	High	obese	364.5	3	0.41	0.54	25	Female	21.021	30.288	18.4	42.35	19.01	13.9	17.8	78.09	74	60.75	170
yes	Moderate	obese	409.8	7.76	2.4	0.21	23	Female	24.199	31.977	21.84	46.46	20.51	14.9	19	78.421	70	68.3	168
yes	Moderate	obese	366.9	17.67	2.09	0.82	28	Female	21.926	30.777	18.82	42.33	18.9	14	17.8	78.652	73	61.15	167
yes	Moderate	obese	536.1	8.88	1.59	0.13	27	Female	28.52	40.213	35.93	53.42	25.56	17.4	22.1	78.733	93	89.35	177
yes	Moderate	obese	419.7	8.08	1.66	0.27	25	Female	26.008	34.853	24.38	45.57	20.24	14.7	18.5	79.459	78	69.95	164
yes	Low	obese	405	11.2	0.37	0.2	24	Female	22.816	30.726	20.74	46.76	20.92	15.3	19.2	79.688	75	67.5	172
yes	Moderate	obese	533.1	5.82	0.43	0.31	25	Female	35.591	49.004	43.54	45.31	21.02	14.8	18.3	80.874	97	88.85	158
yes	Low	obese	395.7	15.81	2.15	0.7	24	Female	23.933	33.01	21.77	44.18	19.42	14.6	17.9	81.564	74	65.95	166
yes	Low	obese	702.6	10.28	1.48	0.2	22	Female	43.012	49.607	58.09	59.01	29.05	19.8	24.2	81.818	106	117.1	165
yes	Low	obese	381.3	11	2.43	0	31	Female	24.215	36.397	23.13	40.42	16.79	13.4	15.8	84.81	72	63.55	162
